# Supplementary material for: Mechanical compaction mechanisms in the input sediments of the Sumatra Subduction Complex- insights from microstructural analysis of cores from IODP Expedition- 362
Source: Copernicus journal article supplement (doi:10.5194/se-2022-11), 2022-02-03
Supplement: Supplementary file 1 [file se-2022-11-supplement-version2.zip]

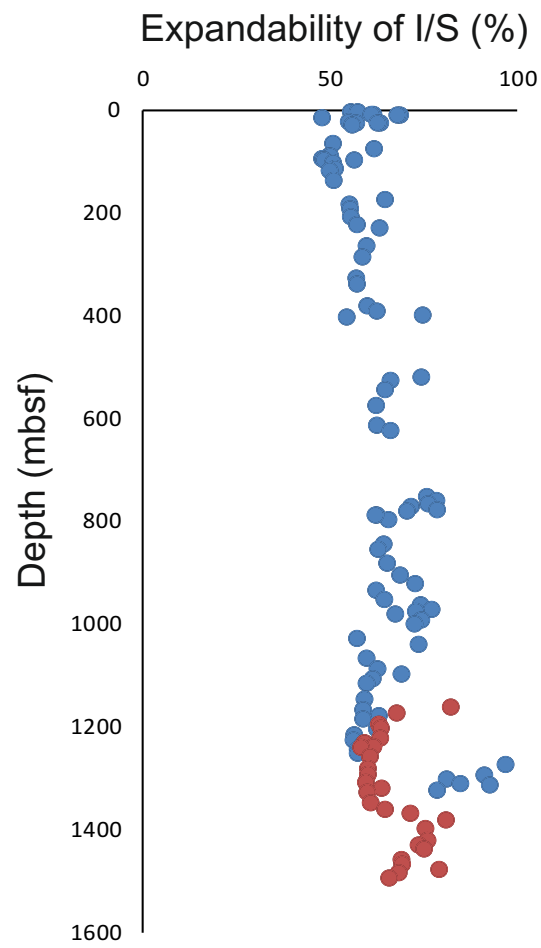

**Figure-S2:** Stratigraphic variation of the expandability of Illite/Smectite (I/S). Blue and red colored points define samples from U1480 and U1481 drill holes respectively (after Rosenberger et al., 2020).
