# Supplementary material for: Mechanical compaction mechanisms in the input sediments of the Sumatra Subduction Complex- insights from microstructural analysis of cores from IODP Expedition- 362
Source: Copernicus journal article supplement (doi:10.5194/se-2022-11), 2022-02-03
Supplement: Supplementary file 2 [file se-2022-11-supplement-version2.zip]

**SN-8**

U1480E-10H-2W-131-133 (74,07mbsf)

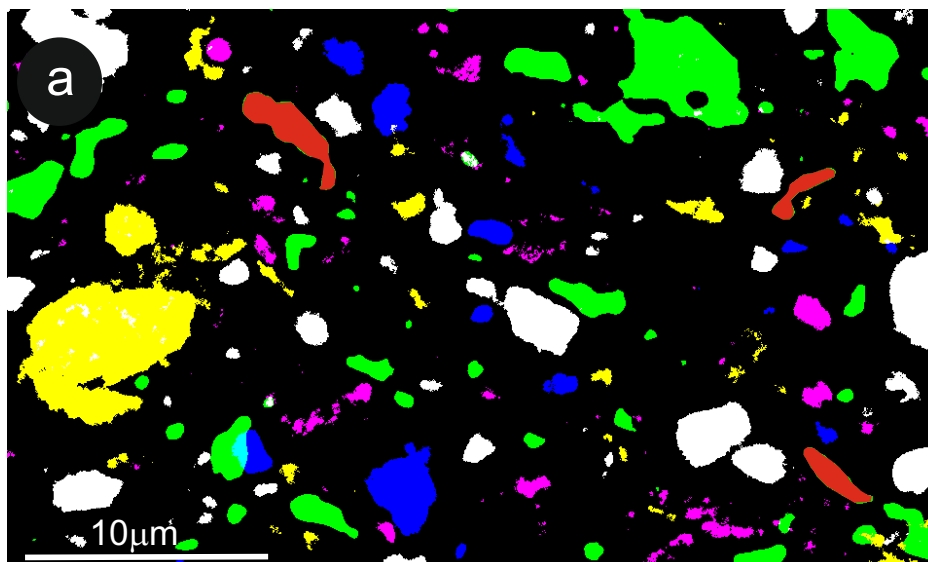

**SN-16**

U1480F-67X-CCW-14-16 (505.68mbsf)

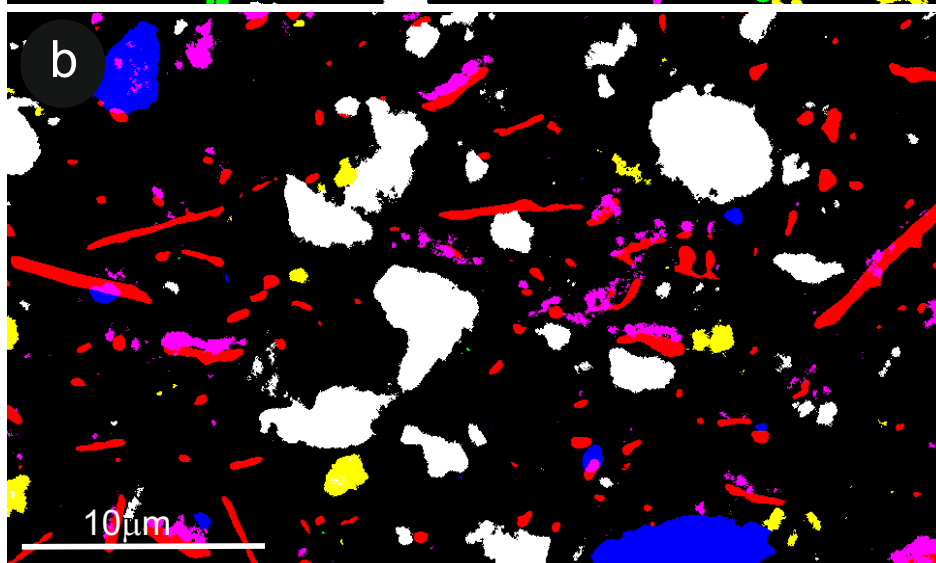

**SN-33**

U1480G-55R-6W-150-152 (1267.14mbsf)

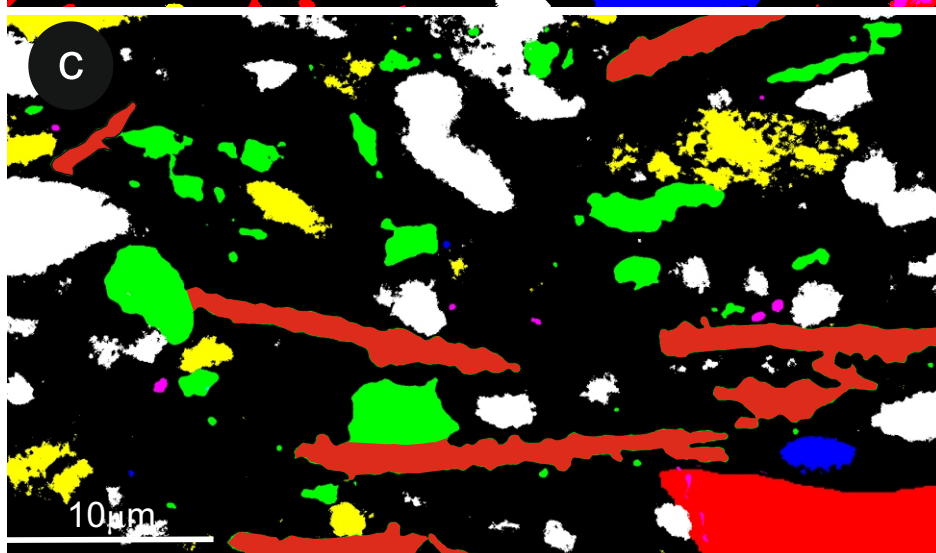

Figure S8: phase maps corresponding to the SE2 images of the sample SN-8, SN-16 and SN-32 in Fig.6. Here, grey= Quartz; yellow=Na feldspar; Green= K-feldspar, Red=mica; pink=pyrite; blue=calcite.
