# Supplementary material for: Mechanical compaction mechanisms in the input sediments of the Sumatra Subduction Complex- insights from microstructural analysis of cores from IODP Expedition- 362
Source: Copernicus journal article supplement (doi:10.5194/se-2022-11), 2022-02-03
Supplement: Supplementary file 3 [file se-2022-11-supplement-version2.zip]

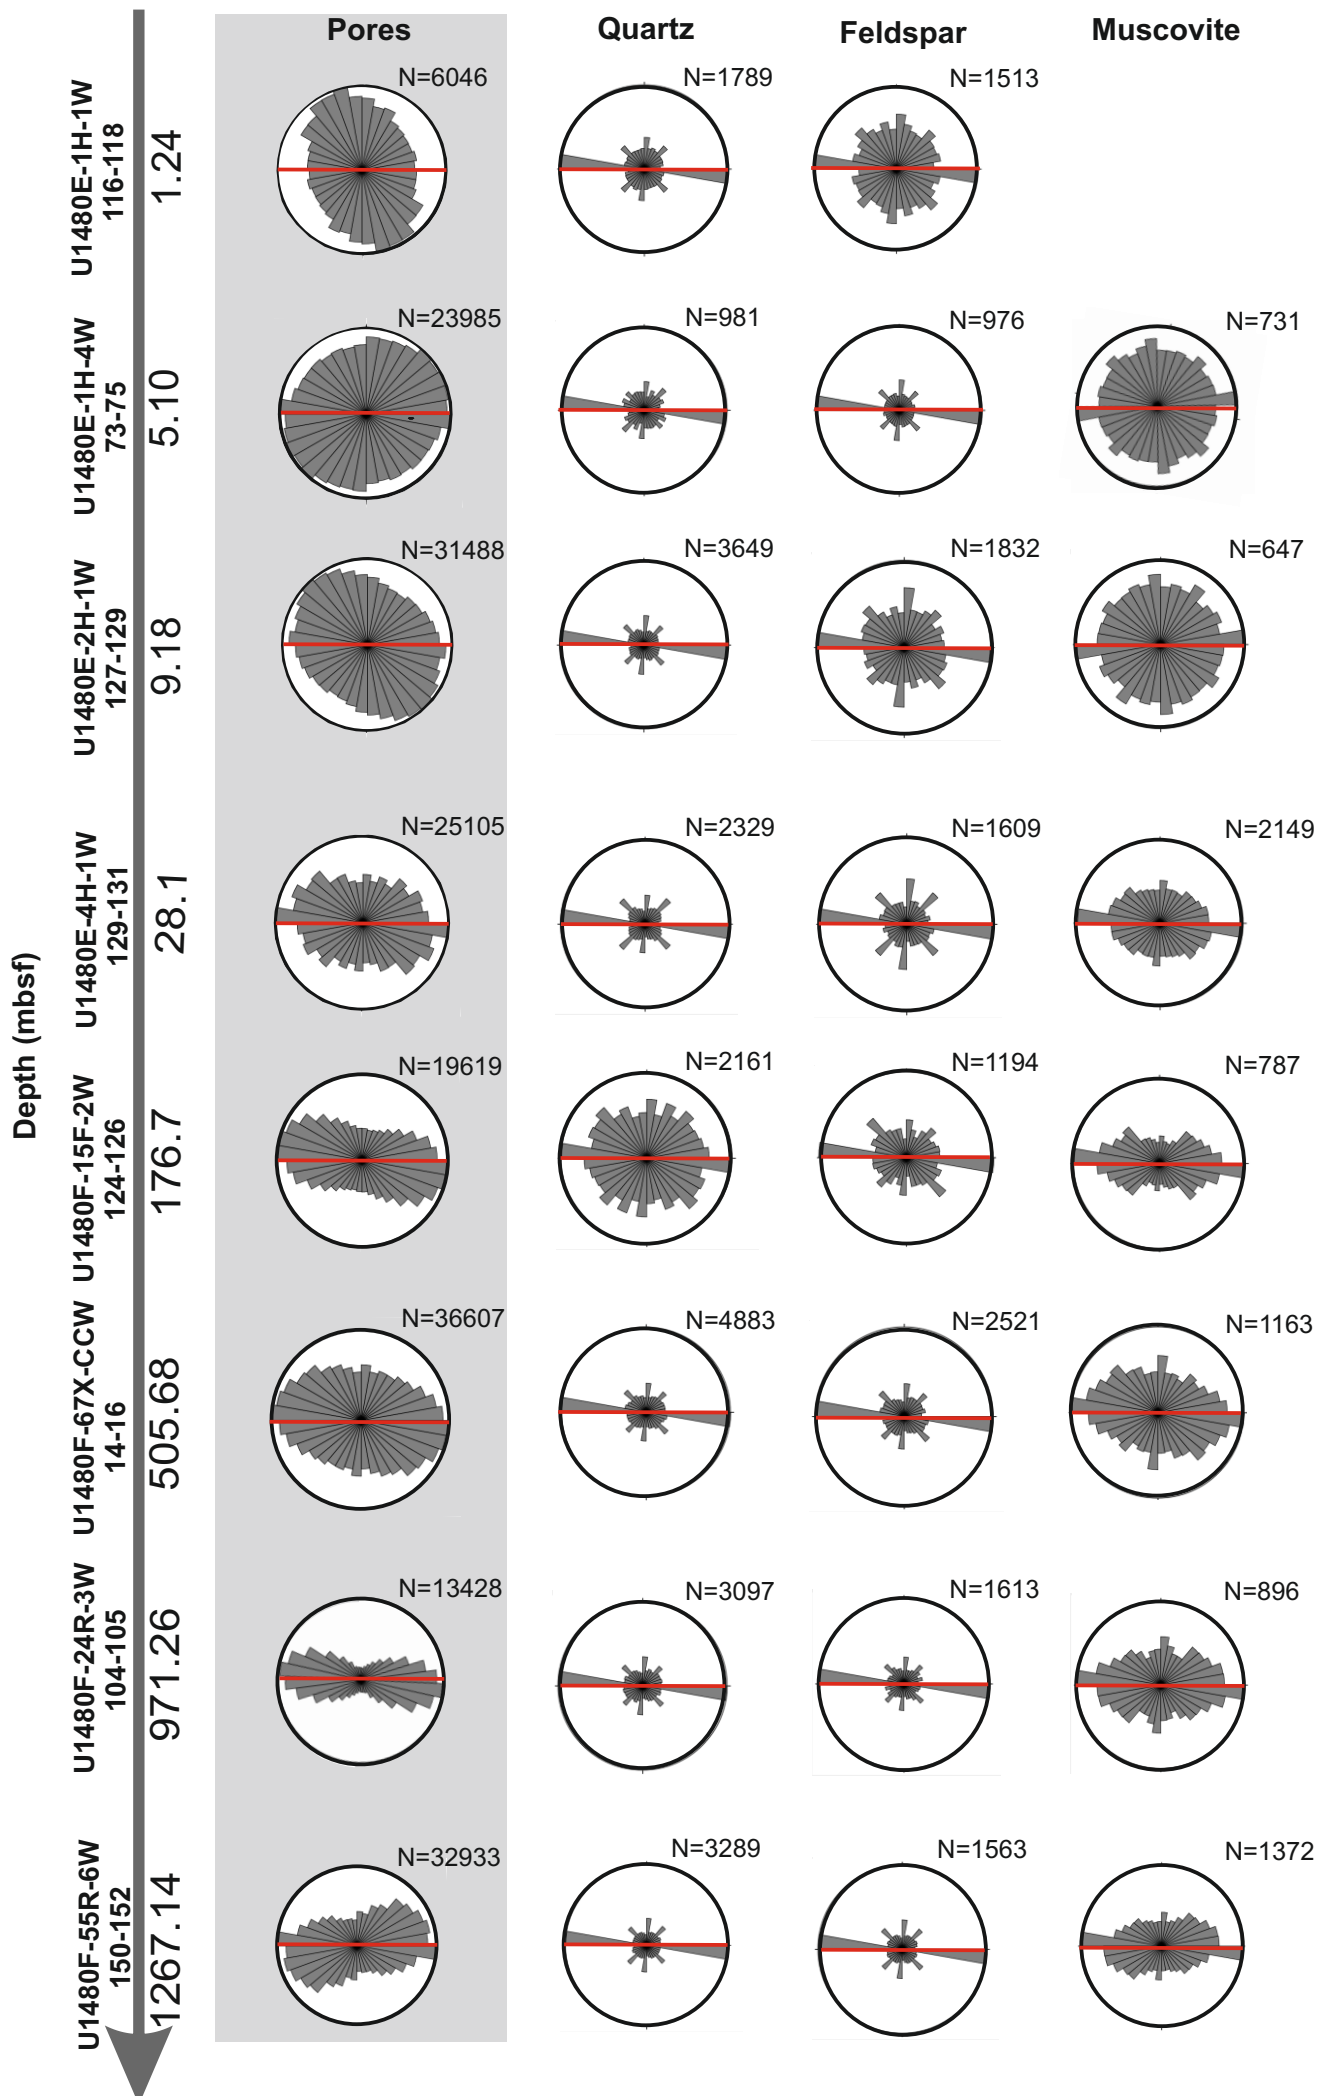

Figure S10: Rose diagram of long axes of pores, quartz, feldspar, and mica grains with respect to bedding planes (red-colored lines). Note: sharp increase in preferred alignment of long axes of pores and mica grains observed around 28mbsf.
