# Supplementary material for: Mechanical compaction mechanisms in the input sediments of the Sumatra Subduction Complex- insights from microstructural analysis of cores from IODP Expedition- 362
Source: Copernicus journal article supplement (doi:10.5194/se-2022-11), 2022-02-03
Supplement: Supplementary file 7 [file se-2022-11-supplement-version2.zip]

**SN-23 (U1480G-14G-2W-68-69, 871.55mbsf)**

Pore segmented Se2 image

Segmented pores overlaid on BSE image

Segmented pores overlaid on phase map

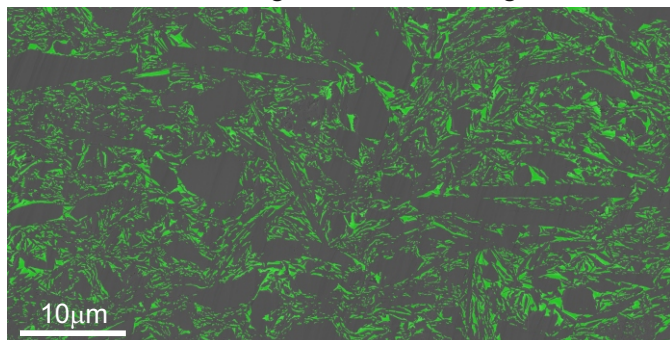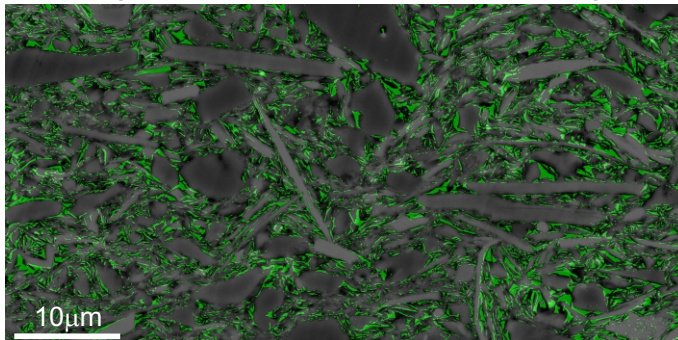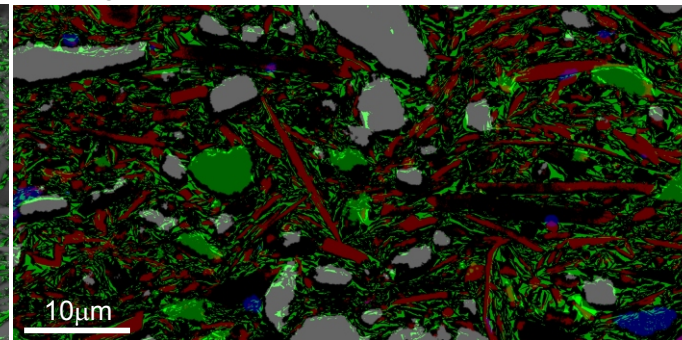

**SN-26 (U1480G-30R-2W-75-77, 1027.91mbsf)**

Pore segmented Se2 image

Segmented pores overlaid on BSE image

Segmented pores overlaid on phase map

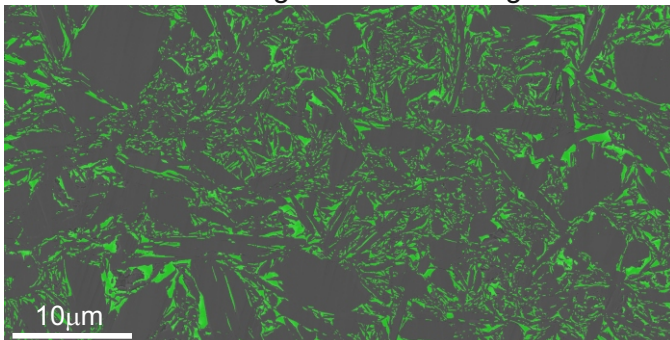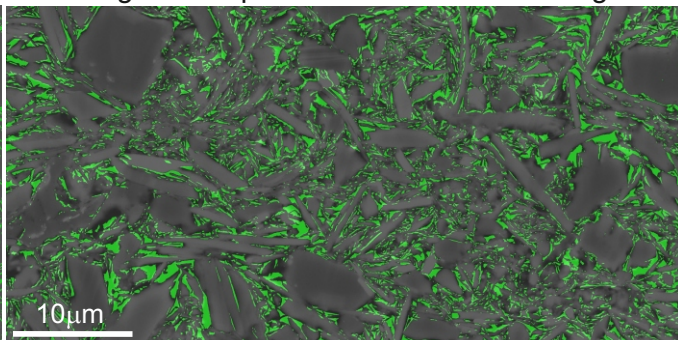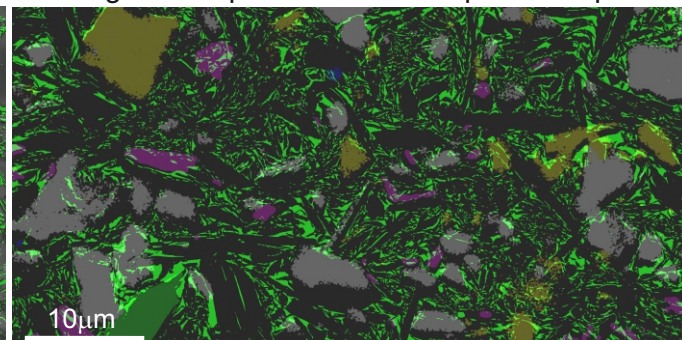

**SN-33 (U1480G-59R-1W-107-109, 1299mbsf)**

Pore segmented Se2 image

Segmented pores overlaid on BSE image

Segmented pores overlaid on phase map

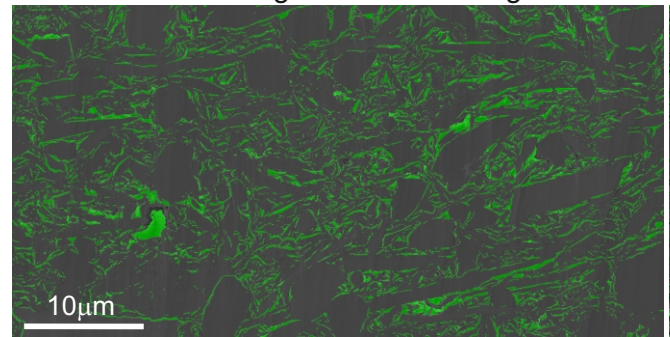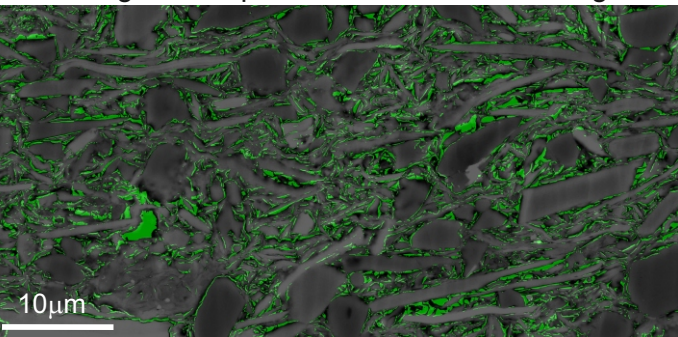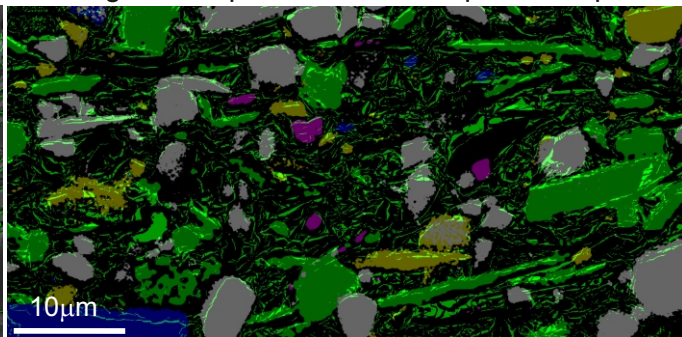

Figure S6: SE2, BSE images and phase maps of the samples SN-23; SN-26 and SN-33 respectively. Green-colored segmented pores overlaid on BSE mosaic and phase maps. In the phase maps, grey= Quartz; yellow=feldspar; Red=mica; pink=pyrite; blue=calcite.
