# Supplementary material for: Mechanical compaction mechanisms in the input sediments of the Sumatra Subduction Complex- insights from microstructural analysis of cores from IODP Expedition- 362
Source: Copernicus journal article supplement (doi:10.5194/se-2022-11), 2022-02-03
Supplement: Supplementary file 8 [file se-2022-11-supplement-version2.zip]

U1480E-1H-1W-116-118 (1.24mbsf)

Pore in fossil

U1480E-1H-4W-73-75 (5.1mbsf)

**a**

5 $\mu$ m

U1480E-1H-1W-116-118 (1.24mbsf)

Pore in fossil

**b**

5 $\mu$ m

U1480E-1H-4W-73-75 (5.1mbsf)

Pore in fossil

**c**

10 $\mu$ m

Pore in nanofossil

**d**

5 $\mu$ m

Figure S11: Large pores within microfossils
