# Supplementary material for: Mechanical compaction mechanisms in the input sediments of the Sumatra Subduction Complex- insights from microstructural analysis of cores from IODP Expedition- 362
Source: Copernicus journal article supplement (doi:10.5194/se-2022-11), 2022-02-03
Supplement: Supplementary file 9 [file se-2022-11-supplement-version2.zip]

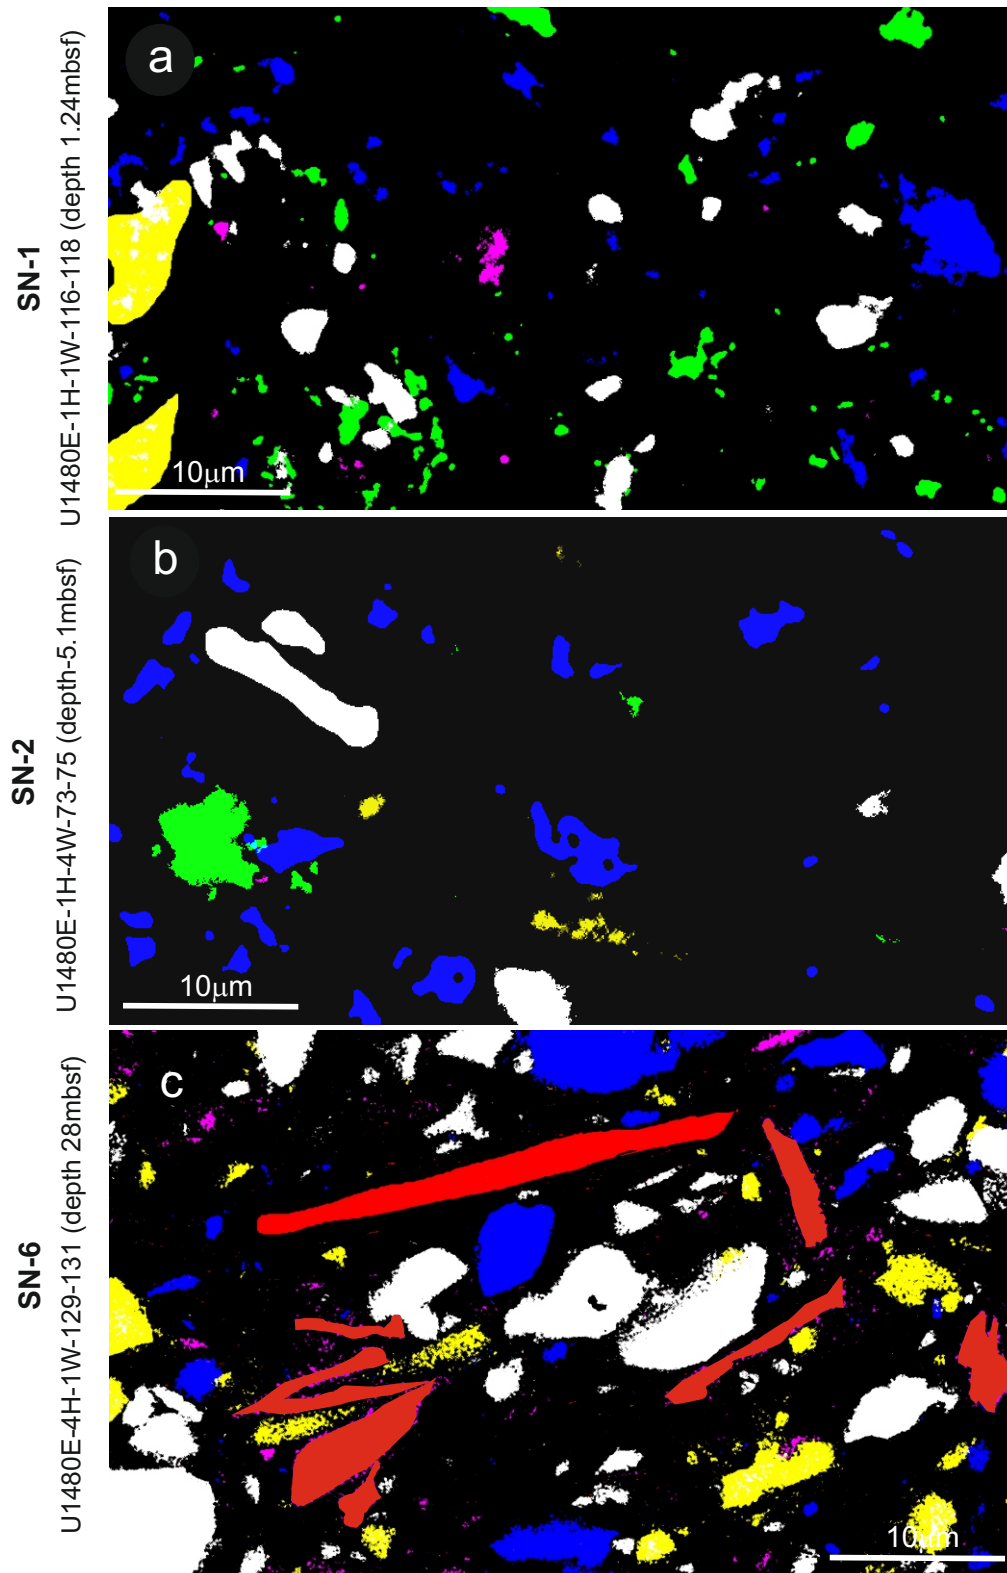

Figure S7: Phase maps corresponding to the SE2 images of the sample SN-1, SN-2 and SN-6 in Fig.5. Here, grey= Quartz; yellow=feldspar; Red=mica; pink=pyrite; blue=calcite.
