# Supplementary material for: Mechanical compaction mechanisms in the input sediments of the Sumatra Subduction Complex- insights from microstructural analysis of cores from IODP Expedition- 362
Source: Copernicus journal article supplement (doi:10.5194/se-2022-11), 2022-02-03
Supplement: Supplementary file 10 [file se-2022-11-supplement-version2.zip]

U1480F-26F-1W-29-31(depth 226.7mbsf)

Se2 image

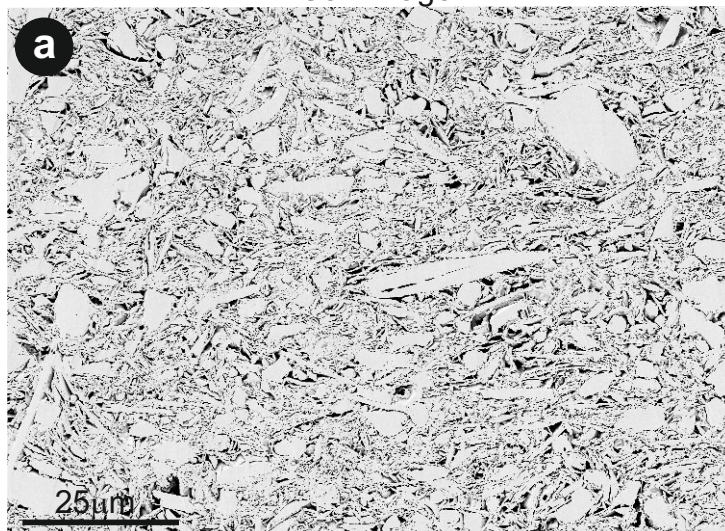

BSE image

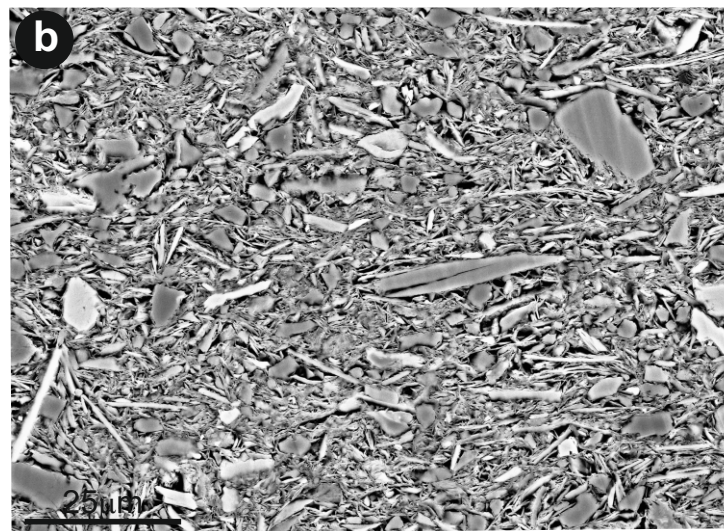

Si map

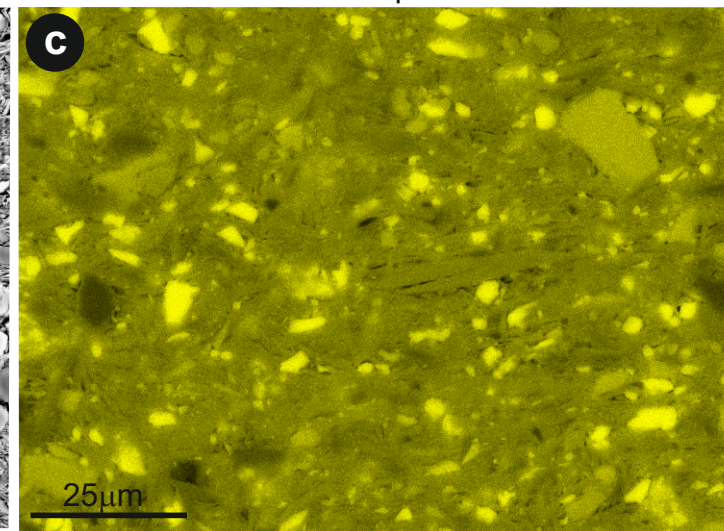

Pore segmented Se2 image

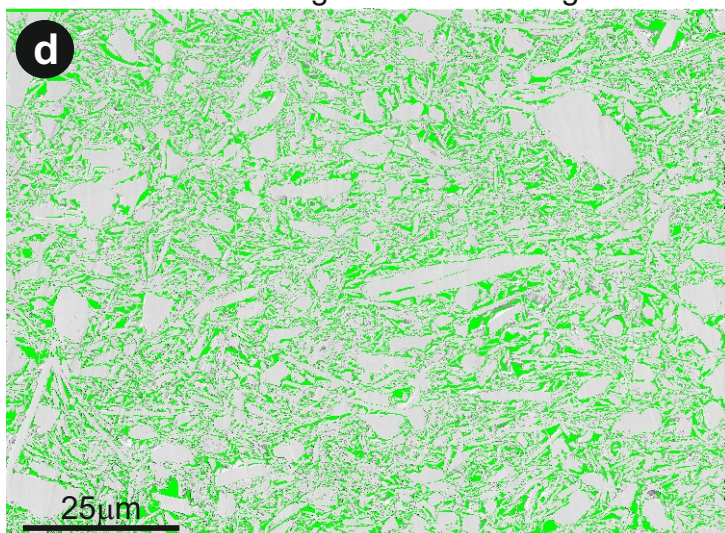

Segmented pores overlaid on BSE image

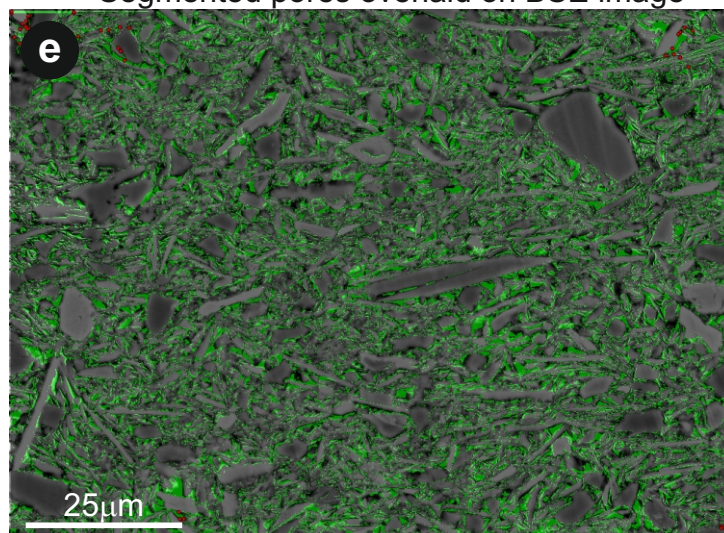

Segmented pores overlaid on mineral phase map

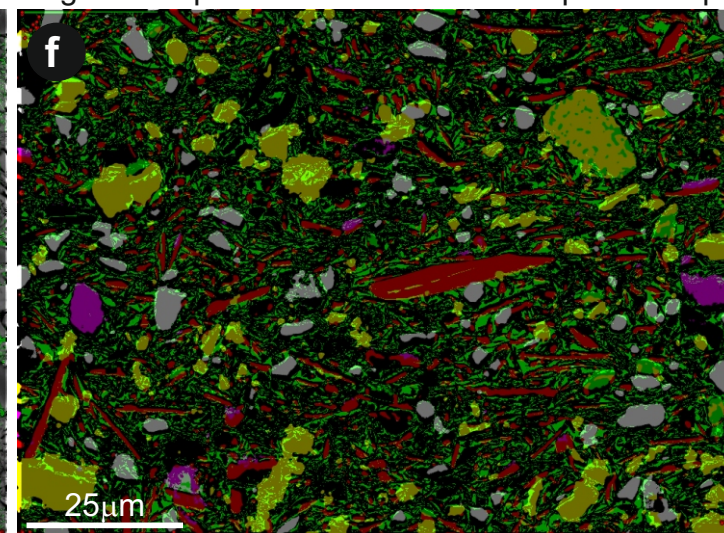

Figure S3: (a) Original SE2 mosaic map for sample U1480F-26F-1W-29-31 imaged at 20,000x magnification; (b) BSE mosaic imaged at 10,000x magnification; (c) Si elemental map for similar cross-section area; (d) Porosity segmented SE2 mosaic map where green areas represent pores; (e) green-colored segmented pores overlaid on BSE mosaic; (f) segmented pores overlaid on phase maps of similar cross section area. Grey = quartz; yellow = feldspar; Red = mica; pink = pyrite; blue = calcite.
