# Supplementary material for: Mechanical compaction mechanisms in the input sediments of the Sumatra Subduction Complex- insights from microstructural analysis of cores from IODP Expedition- 362
Source: Copernicus journal article supplement (doi:10.5194/se-2022-11), 2022-02-03
Supplement: Supplementary file 10 [file Supplementary data-2.xlsx]

## Sheet: Sheet1
	Sample no	Exp	Site	Hole	Core	Type	Sect	Depth (mbsf)	Unit
1st set of samples (analyzed at Aachen)	SN-1	362	U1480	E	1	H	1	1.24	I
	SN-2	362	U1480	E	1	H	4	5.1	I
	SN-3	362	U1480	E	2	H	1	9.18	I
	SN-4	363	U1481	E	2	H	2	10.685	I
	SN-5	364	U1482	E	3	H	6	26.05	I
	SN-6	364	U1482	E	4	H	1	28	IIA
	SN-7	362	U1480	E	9	H	2	63.24	IIA
	SN-8	362	U1480	E	10	H	2	74.07	IIA
	SN-9	362	U1480	E	11	H	5	87.98	IIA
	SN-10	362	U1480	F	2	H	1	98.25	IIA
	SN-11	362	U1480	F	3	H	3	111.1	IIA
	SN-12	362	U1480	F	15	F	2	176.5	IIA
	SN-13	362	U1480	F	26	F	1	226.7	IIA
	SN-14	362	U1480	F	53	X	2	369.19	IIB
	SN-15	362	U1480	F	59	X	1	426.68	IIB
	SN-16	362	U1480	F	67	X	CC	505.32	IIB
	SN-17	362	U1480	F	76	X	1	592.42	IIB
	SN-18	362	U1480	F	80	X	CC	630.55	IIB
	SN-19	362	U1480	F	91	X	1	737.39	IIB
	SN-20	362	U1480	F	92	X	1	751.16	IIB
	SN-21	362	U1480	G	4	R	2	776.17	IIB
	SN-22	362	U1480	G	7	R	CC	802.55	IIC
	SN-23	362	U1480	G	14	R	2	871.87	IIC
	SN-24	362	U1480	G	20	R	1	929.81	IIC
	SN-25	362	U1480	G	24	R	3	971.26	IIC
	SN-26	362	U1480	G	30	R	2	1027.91	IIC
	SN-27	362	U1480	G	37	R	2	1095.74	IIC
	SN-28	362	U1480	G	41	R	1	1119.7	IIC
	SN-29	362	U1480	G	45	R	1	1172.88	IIC
	SN-30	362	U1480	G	46	R	3	1184.39	IIC
	SN-31	362	U1480	G	51	R	CC	1233.15	IIC
	SN-32	362	U1480	G	55	R	6	1267.14	IIIA
	SN-33	362	U1480	G	59	R	1	1299.31	IIIA
2nd set of samples (analyzed at BEG, Austin)	SN-34	362	U1480	H	2	H	2	6.25	IB
	SN-35	362	U1480	E	1	H	6	7.21	IB
	SN-36	362	U1480	H	3	H	1	14.28	IB
	SN-37	362	U1480	E	4	H	1	28.12	IIA
	SN-38	362	U1480	E	7	H	1	50.82	IIA
	SN-39	362	U1480	H	10	H	2	83.02	IIA
	SN-40	362	U1480	H	16	H	1	117.13	IIA
	SN-41	362	U1480	E	12	H	2	92.82	IIA
	SN-42	362	U1480	F	16	F	3	182.62	IIA
	SN-43	362	U1480	F	37	X	2	285.51	IIA
	SN-44	362	U1480	F	55	X	5	394.01	IIB
	SN-45	362	U1480	F	65	X	CC	486.72	IIB
	SN-46	362	U1480	F	79	X	1	621.2	IIB
	SN-47	362	U1480	F	91	X	1	737.47	IIB
	SN-48	362	U1480	G	11	R	1	841.56	IIC
	SN-49	362	U1480	G	23	R	1	959.15	IIC
	SN-50	362	U1480	G	30	R	1	1026.34	IIC
	SN-51	362	U1480	G	42	R	3	1145.91	IIC
	SN-52	362	U1480	G	54	R	2	1251.51	IIIA
	SN-53	362	U1481	A	23	R	5	1358.95	IIC
	SN-54	362	U1481	A	32	R	1	1432.59	IIIA
	SN-55	362	U1481	A	38	R	3	1493.39	IIIA
