# Supplementary material for: Mechanical compaction mechanisms in the input sediments of the Sumatra Subduction Complex- insights from microstructural analysis of cores from IODP Expedition- 362
Source: Copernicus journal article supplement (doi:10.5194/se-2022-11), 2022-02-03
Supplement: Supplementary file 11 [file se-2022-11-supplement-version2.zip]

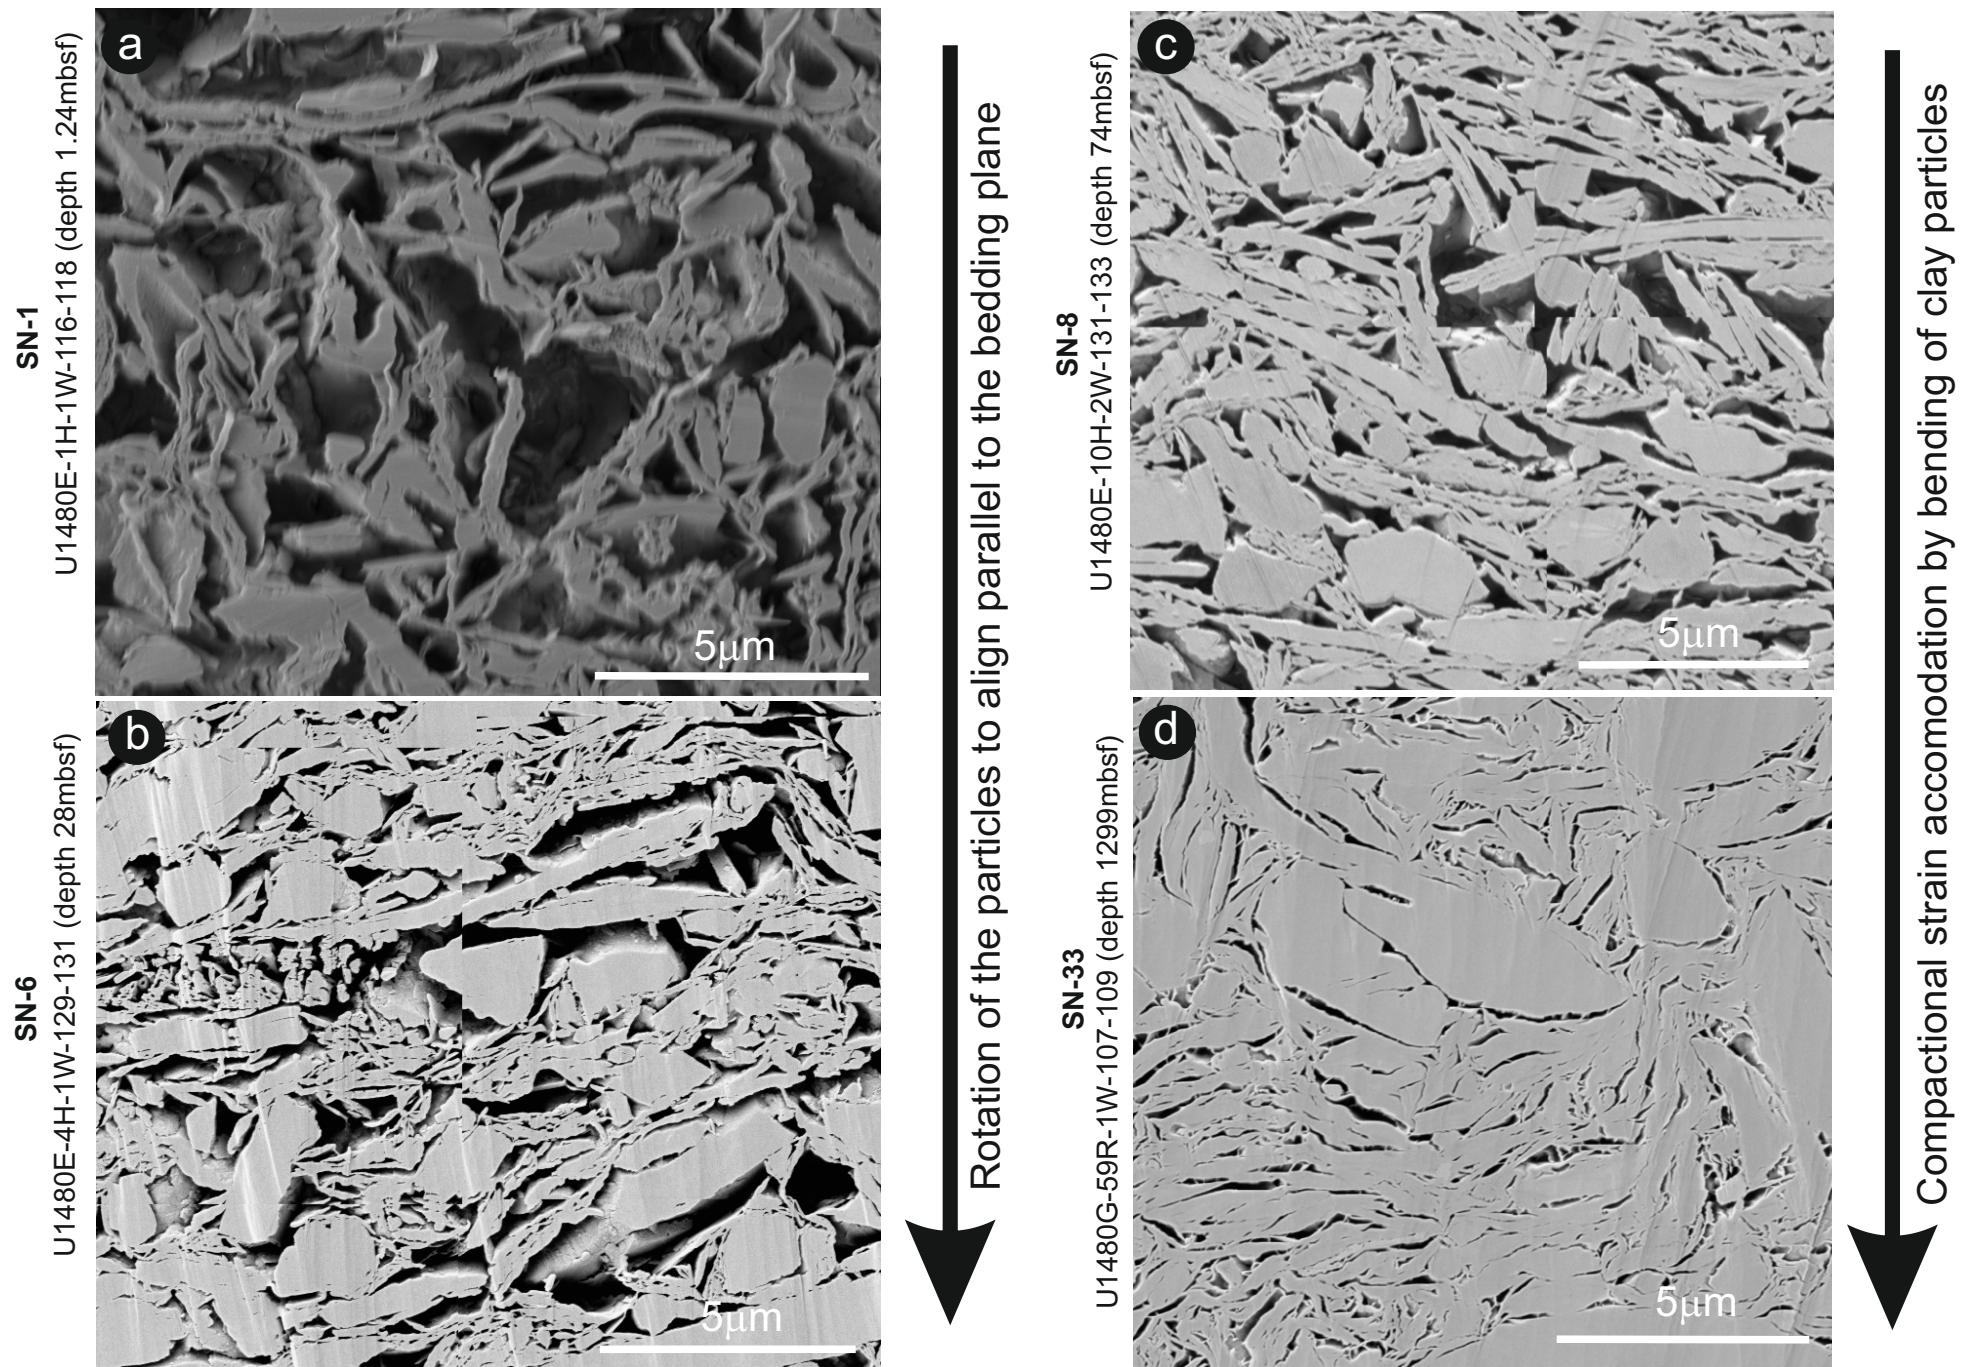

**Figure S12: (a) and (b) Micromechanical mechanism of reduction in porosity above 28mbsf depth by rotation of clay particles to align parallel to the bedding plane.(c) and (d) reduction in porosity by bending of the clay particles.**
