# Supplementary material for: Mechanical compaction mechanisms in the input sediments of the Sumatra Subduction Complex- insights from microstructural analysis of cores from IODP Expedition- 362
Source: Copernicus journal article supplement (doi:10.5194/se-2022-11), 2022-02-03
Supplement: Supplementary file 11 [file supplementary data-7.xlsx]

## Sheet: Sheet1
Units	Sample no	Drill Core descriptions							Depth (mbsf)	Ship board moisture and density analysis data (MAD)			Secondary electron (SE2) image analysis (BIB-SEM)									Mineral phase analysis using BSEamges and EDX map (BIB-SEM)
		Exp	Site	Hole	Core	Type	Sect	A/W		MAD (Porosity)	Compaction strain	COPL	Magnification	Area imaged (µm2)	Pixel size (nm)	REA (mm2)	Number of pores detected	Porosity	Maximum Pore orientation (with respect to bedding)	Pore statistics		Magnification of BSE images	Clay + muscovite (%)	mineral (%)
																				Fractal dimension	C
Unit-I	SN-1	362	U1480	E	1	H	1	W	1.24	80.0235	1	0	20000x	7586.36	14.22	65 x 65	6046	32.78	75	1,750+-0,139	1,.731+-1,039	10000x	77.08	22.92
	SN-2	362	U1480	E	1	H	4	W	5.1	75.2063	1.1192	19.4292	20000x	11028.9	14.22	60 x60	23985	27.41	35	1,89+-0,473	-1.37+-0.112	10000x	75.26	24.74
	SN-3	362	U1480	E	2	H	1	W	9.18	67.6787	1.459	38.194	20000x	10926.9	14.22	70 x 70	31488	21.49	55	1,84+-0,5066	-1.72+-0.185	10000x	72.29	27.71
	SN-4	363	U1481	E	2	H	2	W	10.685	65.4864	1.55796	42.1199	20000x	11174.2	14.22	65 x 65	17124	24.5	25	1,79+-0,21	-2.32+-0.27	10000x	76.28	23.72
	SN-5	364	U1482	E	3	H	6	W	26.05	64.2791	1.61246	44.0761	20000x	9178.23	14.22	75 x 75	15410	19.42	65	1,89+-0,26	1,42+-0,138	10000x	73.14	26.86
Unit-IIA	SN-6	364	U1482	E	4	H	1	W	28	54.3032	2.06278	56.2847	20000x	14284	14.22	80 x 80	25105	23.63	0	1,76+-0,17	2,47+-0,02	10000x	74.68	25.32
	SN-7	362	U1480	E	9	H	2	W	63.24	50.8185	2.22008	59.3821	20000x	9532.3	14.22	70 x 70	17624	21.32	0	1,822+-0,2	2,11+-0,553	10000x	61.77	38.23
													10000x	32657.3	28.47	75 x 75	83426	17.48
													5000x	47750.1	56.44	85 x 85	135023	13.2
	SN-8	362	U1480	E	10	H	2	W	74.07	53.6708	2.09133	56.8814	20000x	6295.64	14.22	75 x 75	14480	20.57	10	1,964+-0,466	1,861+-0,120	10000x	73.83	26.17
	SN-9	362	U1480	E	11	H	5	W	87.98	48.1676	2.33975	61.4594	20000x	12092.8	14.22	70 x 70	19435	17.91	0	1,873+-0,306	1,692+-0,157	10000x	60.69	39.31
	SN-10	362	U1480	F	2	H	1	W	98.25	51.0298	2.21054	59.2068	20000x	8945.04	14.22	70 x 70	17003	21.73	0	1,986+-0,8116	-0.941+-0.12	10000x	68.37	31.63
	SN-11	362	U1480	F	3	H	3	W	111.1	51.9008	2.17123	58.4681	20000x	11796.1	14.22	75 x 75	35322	19.42	0	1.8353+-0.22	1.21+-0.56	10000x	71.5	28.5
	SN-12	362	U1480	F	15	F	2	W	176.5	45.233	2.47221	63.5245	20000x	11162.1	14.22	70 x 70	18619	16.91	0	1.93+-0.20	0.918+-0.43	10000x	69.37	30.63
	SN-13	362	U1480	F	26	F	1	W	226.7	46.6278	2.40925	62.5714	20000x	10095.8	14.22	80 x 80	29038	18.16	0	1.87+-0.1383	-1.471+-0.36	10000x	73.28	26.72
Unit-IIC	SN-14	362	U1480	F	53	X	2	W	369.19	42.9582	2.5749	64.9792	20000x	11096.1	14.22	65 x 65	26650	15.69	0	1.876+-0.140	-1.09+-0.271	10000x	71.47	28.53
	SN-15	362	U1480	F	59	X	1	W	426.68	38.54	2.77434	67.4967	20000x	11424.4	14.22	60 x 60	31589	15.82	0	1.79+-0.26	1.41+-0.32	10000x	66	34
													10000x	29284	28.47	85 x 85	78391	11.92
													5000x	48685.3	56.44	90 x 90	141476	9.13
	SN-16	362	U1480	F	67	X	CC	W	505.32	42.66	2.58836	65.1613	20000x	11601.3	14.22	80 x 80	36607	15.48	0	1.76+-0.34	1.42+-0.72	10000x	71.4	28.6
	SN-17	362	U1480	F	76	X	1	W	592.42	43.77	2.53825	64.4736	20000x	13552.1	14.22	85 x 85	16792	14.21	0	1.87+-0.19	1.14+-0.13	10000x	59.79	40.21
	SN-18	362	U1480	F	80	X	CC	W	630.55	39.103	2.74892	67.1962	20000x	14205.8	14.22	70 x 70	29208	13.91	0	1.866+-0.175	-0.513+-0.19	10000x	65.39	34.61
	SN-19	362	U1480	F	91	X	1	W	737.39	35.7786	2.89899	68.8943	20000x	11929.9	14.22	65 x 65	30132	12.81	0	1.848+-0.26	-0.342+-0.41	10000x	75.61	24.39
	SN-20	362	U1480	F	92	X	1	W	751.16	38.7644	2.76421	67.3776	20000x	9912.07	14.22	70 x70	26299	12.4	0	1.874+-0.09	-0.213+-0.21	10000x	74.28	25.72
	SN-21	362	U1480	G	4	R	2	W	776.17	34.1446	2.97275	69.6661	20000x	9892.76	14.22	45 x 45	22878	13.18	0	1,98+-0,13	0.427+-0.20	10000x	73.71	26.29
Unit-IIC	SN-22	362	U1480	G	7	R	CC	W	802.55	43.77	2.53825	64.4736	20000x	10165	14.22	70 x 70	10083	13.72	0	1,897+-0,17	-1.201+-0.27	10000x	67.77	32.23
	SN-23	362	U1480	G	14	R	2	W	871.87	34.57	2.95355	69.4689	20000x	11355.7	14.22	65 x 65	31864	13.45	0	1,86+-0,22	1,469+-0,13	10000x	68.72	31.28
	SN-24	362	U1480	G	20	R	1	W	929.81	39.15	2.7468	67.1709	20000x	10278.3	14.22	50 x 50	32360	13.48	10	1,94+-0,16	0,245+-1,36	10000x	71.58	28.42
	SN-25	362	U1480	G	24	R	3	W	971.26	31.1134	3.10958	71.0009	20000x	10786.4	14.22	65 x 65	13428	10.51	10	1,83+-0,107	0,512+-0,15	10000x	73.09	26.91
	SN-26	362	U1480	G	30	R	2	W	1027.91	35.97	2.89035	68.8013	20000x	12391.7	14.22	50 x 50	33593	13.59	10	1,77+-0,23	1,32+-0,325	10000x	70.27	29.73
	SN-27	362	U1480	G	37	R	2	W	1095.74	32.2533	3.05813	70.513	20000x	7531.43	14.22	60 x 60	8502	9.78	0	1,725+-0,32	1,45+-0.613	10000x	74.79	25.21
	SN-28	362	U1480	G	41	R	1	W	1119.7	33.3886	3.00688	70.0104	20000x	11980.6	14.22	60 x 60	30150	13.37	0	1,85+-0,1746	1,37+-1,41	10000x	64.69	35.31
	SN-29	362	U1480	G	45	R	1	W	1172.88	36.34	3.05421	68.62	20000x	8077.19	14.22	70 x 70	13780	14.65	0	1,83+-0,18	-2.725+-0.23	10000x	56.1	43.9
													10000x	46906.7	28.47	90 x 90	133051	12.65
													5000x	49575.4	56.44	100 x 100	100739	11.69
	SN-30	362	U1480	G	46	R	3	W	1184.39	27.97	3.25148	72.2664	20000x	11815.1	14.22	50 x 50	24133	11.52	0	1,85+-0,26	-0.451+-0.29	10000x	67.59	32.41
	SN-31	362	U1480	G	51	R	CC	W	1233.15	32.1272	3.06382	70.5678	20000x	11479.3	14.22	70 x 70	26793	13.64	0	1,73+-0,18	1,241+-0,341	10000x	60.74	39.26
Unit-IIIA	SN-32	362	U1480	G	55	R	6	W	1267.14	30.179	3.15176	71.389	20000x	11665.1	14.22	70 x 70	32933	9.96	0	1,87+-0,1376	0,1165+-1,210	10000x	73.29	26.71
	SN-33	362	U1480	G	59	R	1	W	1299.31	44.4489	2.50761	64.0394	20000x	7132.13	14.22	60 x 60	18350	10.47	0	1,99+-0,311	-0.117+-0.329	10000x	68.31	31.69
