# Supplementary material for: Mechanical compaction mechanisms in the input sediments of the Sumatra Subduction Complex- insights from microstructural analysis of cores from IODP Expedition- 362
Source: Copernicus journal article supplement (doi:10.5194/se-2022-11), 2022-02-03
Supplement: Supplementary file 12 [file se-2022-11-supplement-version2.zip]

Archive with 18 entries (18 files):
- Document S1.docx
- Document S2.docx
- Figure S1.pdf
- Figure S10.pdf
- Figure S11.pdf
- Figure S12.pdf
- Figure S2.pdf
- Figure S3.pdf
- Figure S4.pdf
- Figure S5.pdf
- Figure S6.pdf
- Figure S7.pdf
- Figure S8.pdf
- Figure S9.pdf
- Table S1.docx
- Table S2.xlsx
- Table S3.docx
- Table S4.docx
