# Supplementary material for: Mechanical compaction mechanisms in the input sediments of the Sumatra Subduction Complex- insights from microstructural analysis of cores from IODP Expedition- 362
Source: Copernicus journal article supplement (doi:10.5194/se-2022-11), 2022-02-03
Supplement: Supplementary file 15 [file se-2022-11-supplement.zip]

**SN-11 (U1480F-3H-3W-124-126, 111.1mbsf)**

Pore segmented Se2 image

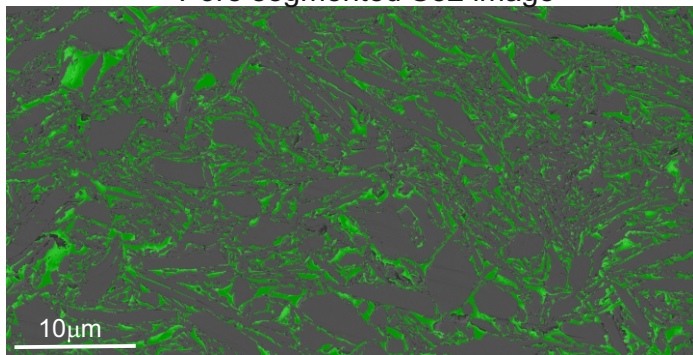

Segmented pores overlaid on BSE image

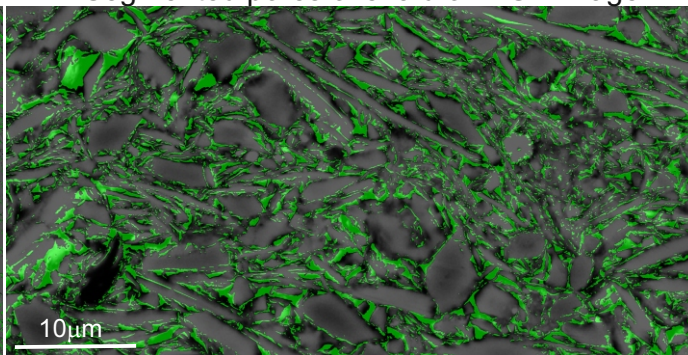

Segmented pores overlaid on phase map

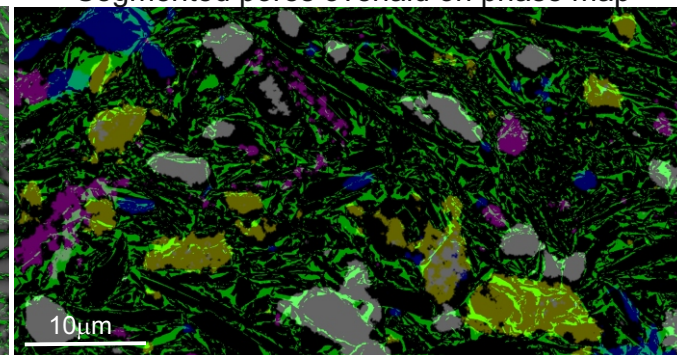

**SN-14 (U1480F-53X-2W-72-74, 369.19mbsf)**

Pore segmented Se2 image

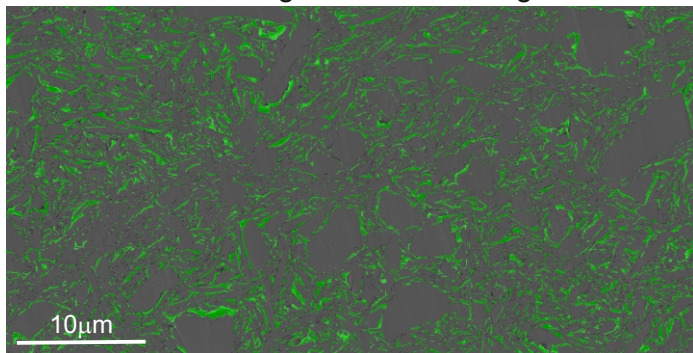

Segmented pores overlaid on BSE image

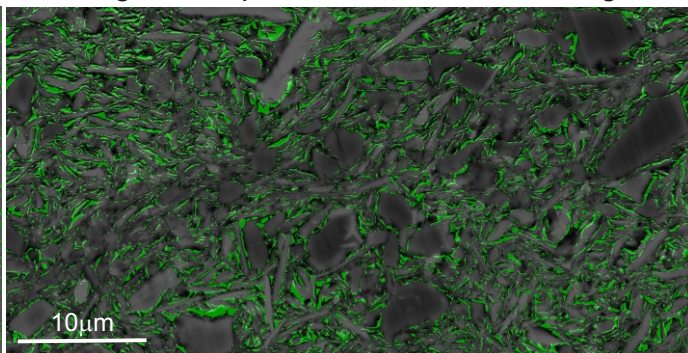

Segmented pores overlaid on phase map

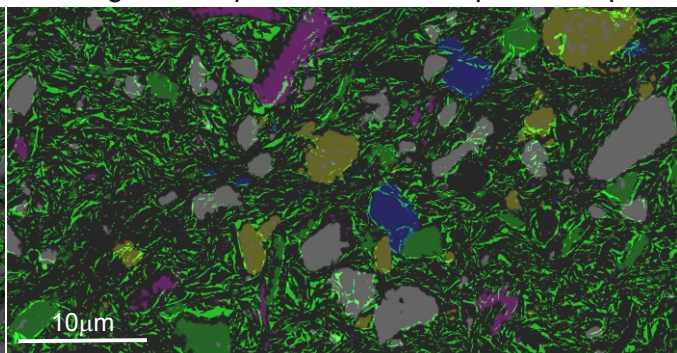

**SN-16 (U1480F-67X-CCW-14-16, 505.68mbsf)**

Pore segmented Se2 image

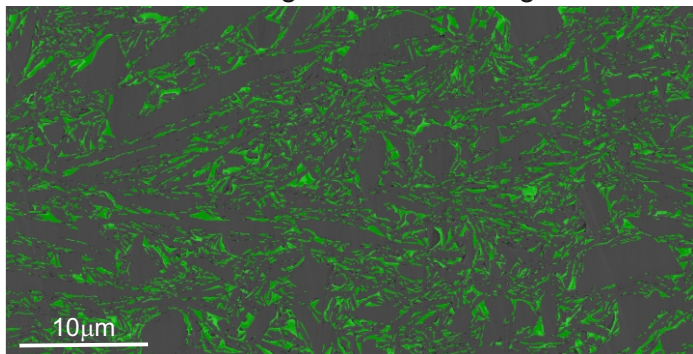

Segmented pores overlaid on BSE image

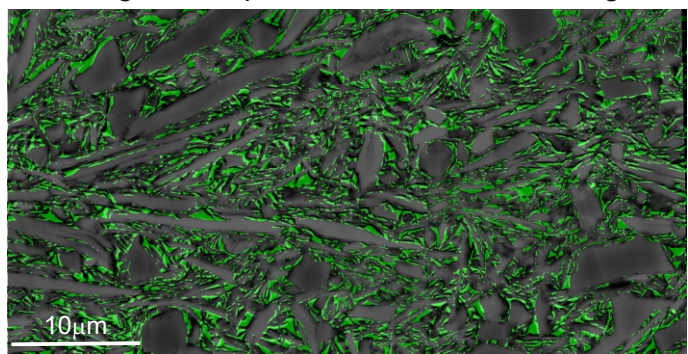

Segmented pores overlaid on phase map

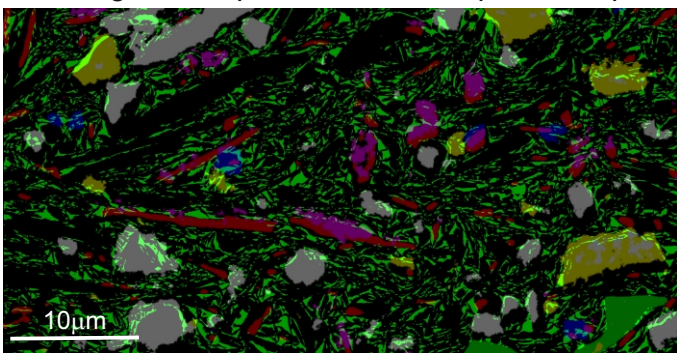

Supplementary data-5: Represents SE2, BSE images and phase maps of the samples SN-11; SN-14 and SN-16 respectively. Green-colored segmented pores overlaid on BSE mosaic and phase maps. In the phase maps, grey= Quartz; yellow=feldspar; Red=mica; pink=pyrite; blue=calcite.
