# Supplementary material for: Mechanical compaction mechanisms in the input sediments of the Sumatra Subduction Complex- insights from microstructural analysis of cores from IODP Expedition- 362
Source: Copernicus journal article supplement (doi:10.5194/se-2022-11), 2022-02-03
Supplement: Supplementary file 16 [file se-2022-11-supplement.zip]

Archive with 16 entries (16 files):
- Supplementary data/Supplementary data-1.docx
- Supplementary data/Supplementary data-10.pdf
- Supplementary data/Supplementary data-11.pdf
- Supplementary data/Supplementary data-12.pdf
- Supplementary data/supplementary data-13.pdf
- Supplementary data/Supplementary data-14.pdf
- Supplementary data/Supplementary data-15.docx
- Supplementary data/Supplementary data-16.docx
- Supplementary data/Supplementary data-2.xlsx
- Supplementary data/Supplementary data-3.pdf
- Supplementary data/Supplementary data-4.pdf
- Supplementary data/Supplementary data-5.pdf
- Supplementary data/Supplementary data-6.pdf
- Supplementary data/supplementary data-7.xlsx
- Supplementary data/Supplementary data-8.pdf
- Supplementary data/Supplementary data-9.pdf
