# Supplementary material for: Mechanical compaction mechanisms in the input sediments of the Sumatra Subduction Complex- insights from microstructural analysis of cores from IODP Expedition- 362
Source: Copernicus journal article supplement (doi:10.5194/se-2022-11), 2022-02-03
Supplement: Supplementary file 16 [file se-2022-11-supplement.zip › Supplementary data/Supplementary data-4.pdf]

**SN-2 (U1480E-1H-4W-73-75, depth-5.1mbsf)**

Pore segmented Se2 image

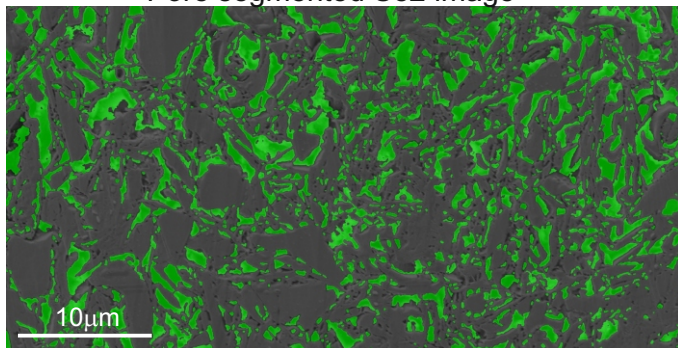

Segmented pores overlaid on BSE image

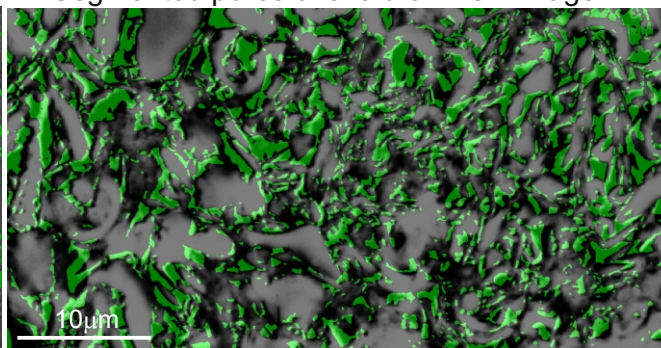

Segmented pores overlaid on phase map

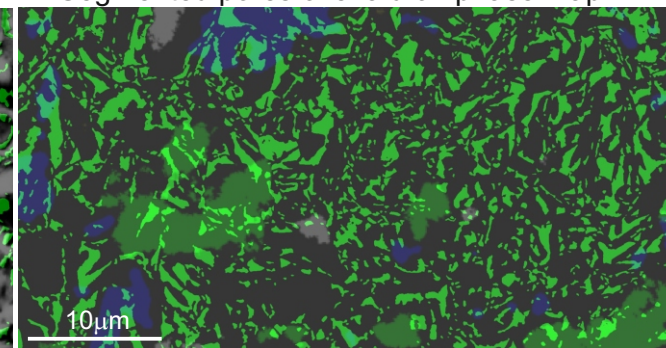

**SN-3 (U1480E-2H-1W-127-129, depth 9,18mbsf)**

Pore segmented Se2 image

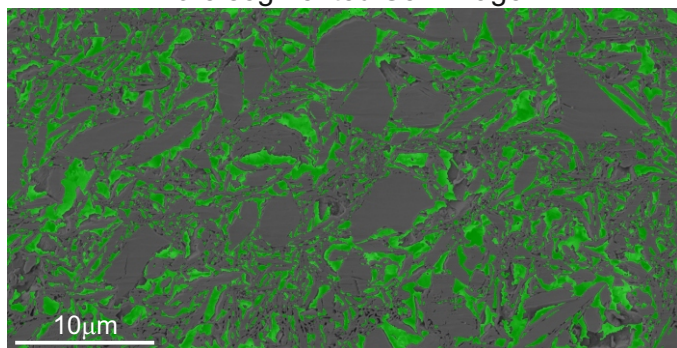

Segmented pores overlaid on BSE image

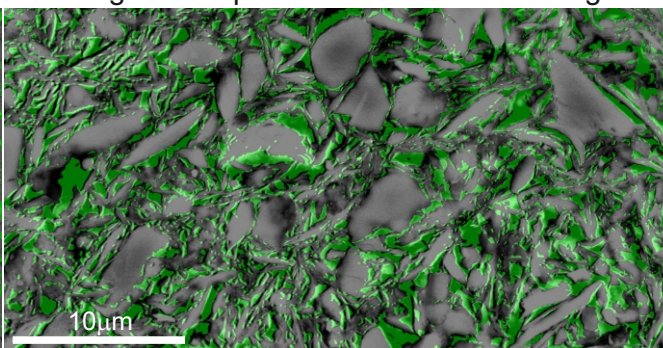

Segmented pores overlaid on phase map

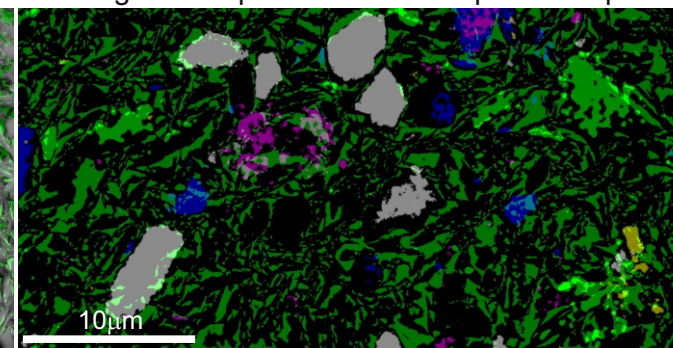

**SN-6 (U1480E-4H-1W-129-131, depth 28mbsf)**

Pore segmented Se2 image

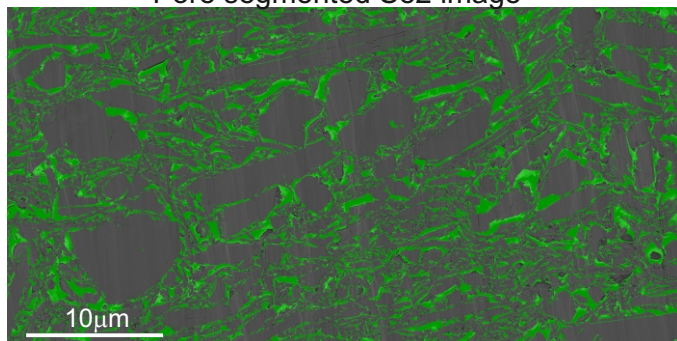

Segmented pores overlaid on BSE image

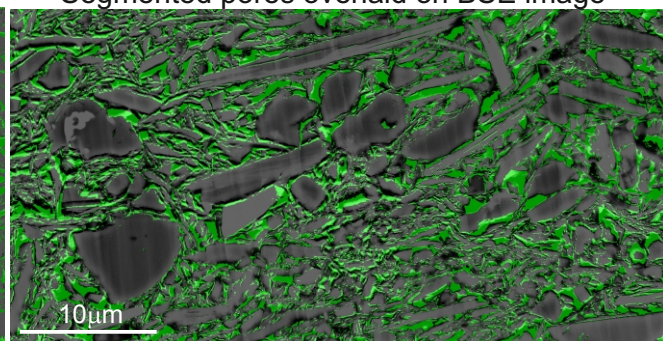

Segmented pores overlaid on phase map

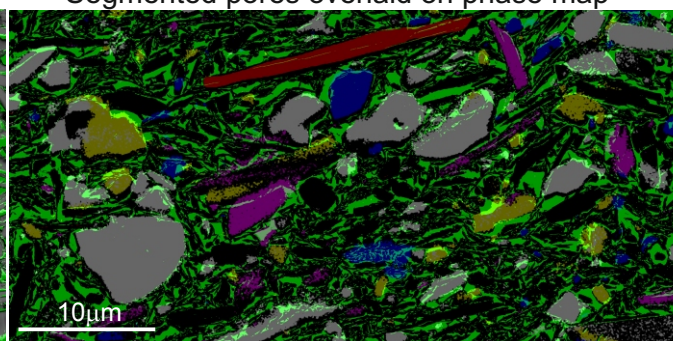

Supplementary data-4: SE2, BSE image and phase maps of the samples SN-2; SN-3 and SN-6 respectively. Green-colored segmented pores overlaid on BSE mosaic and phase maps. In the phase maps, grey= Quartz; yellow=feldspar; Red=mica; pink=pyrite; blue=calcite.
