# Supplementary material for: Mechanical compaction mechanisms in the input sediments of the Sumatra Subduction Complex- insights from microstructural analysis of cores from IODP Expedition- 362
Source: Copernicus journal article supplement (doi:10.5194/se-2022-11), 2022-02-03
Supplement: Supplementary file 16 [file se-2022-11-supplement.zip › Supplementary data/Supplementary data-9.pdf]

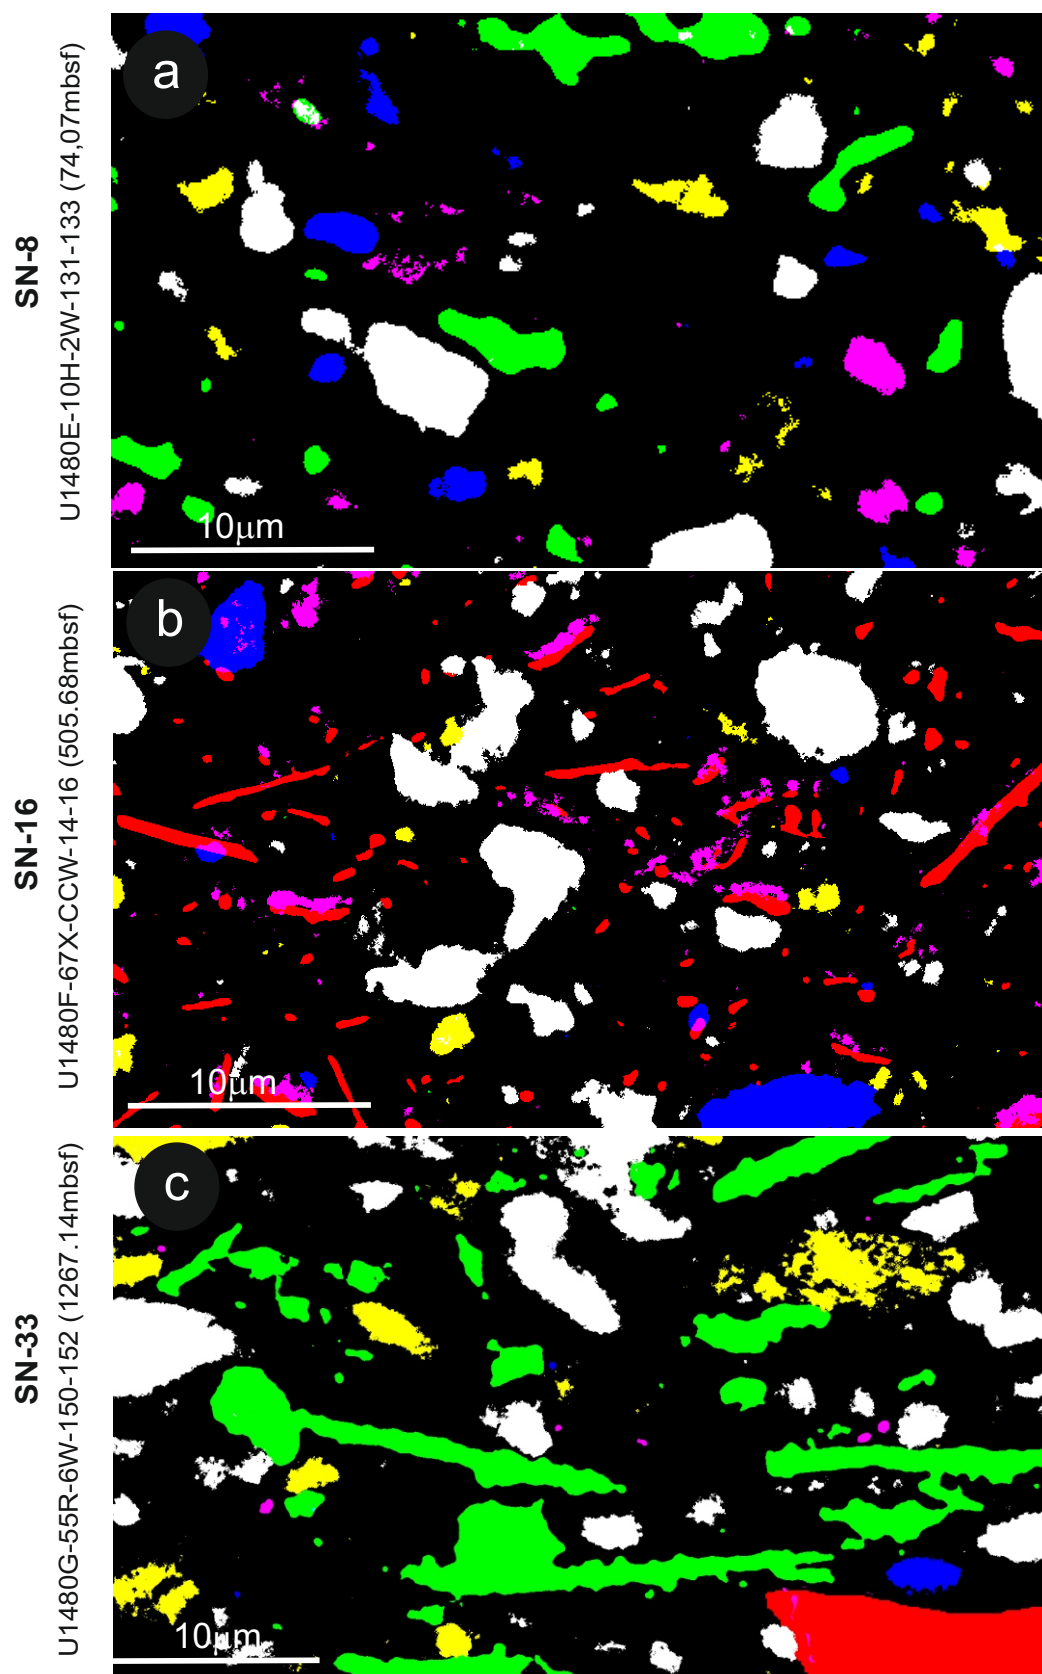

Supplementary data-9: phase maps corresponding to the SE2 images of the sample SN-8, SN-16 and SN-32 in Fig.6.

Here, grey= Quartz; yellow=feldspar; Red=mica; pink=pyrite; blue=calcite.
