# Supplementary material for: Mechanical compaction mechanisms in the input sediments of the Sumatra Subduction Complex- insights from microstructural analysis of cores from IODP Expedition- 362
Source: Copernicus journal article supplement (doi:10.5194/se-2022-11), 2022-02-03
Supplement: Supplementary file 16 [file se-2022-11-supplement.zip › Supplementary data/Supplementary data-10.pdf]

**SN-10 (U1480F-2H-1W-28-30, depth 98.25mbsf)**

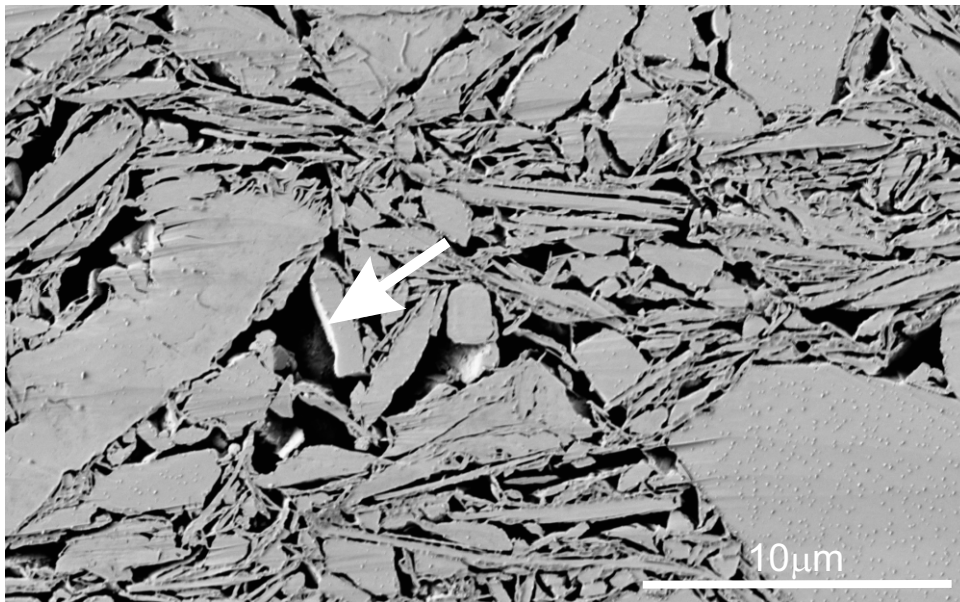

**SN-22 (U1480G-7R-CCW-4-6, depth 802.55mbsf)**

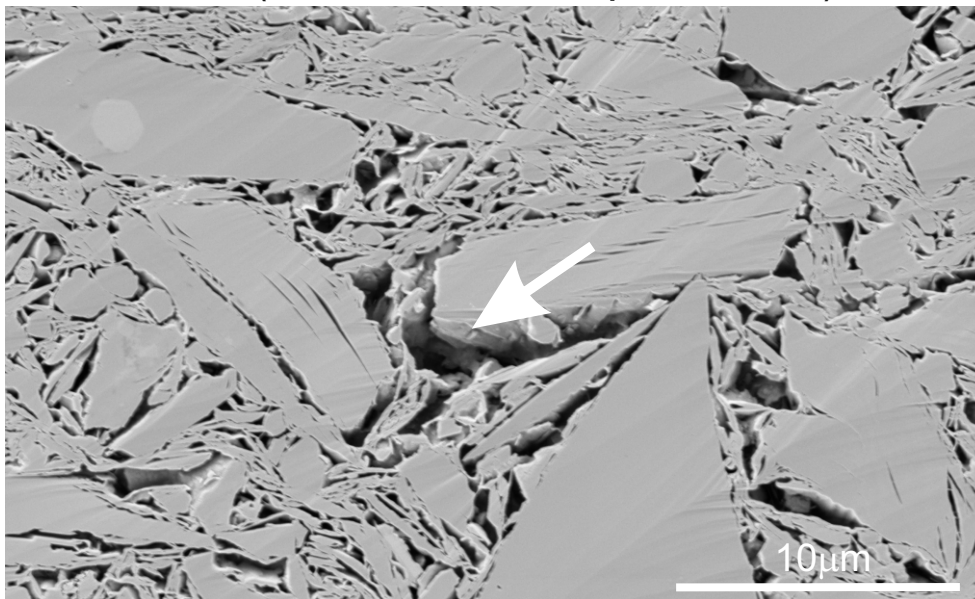

**SN-33 (U1480G-59R-1W-107-109, depth 1299.31mbsf)**

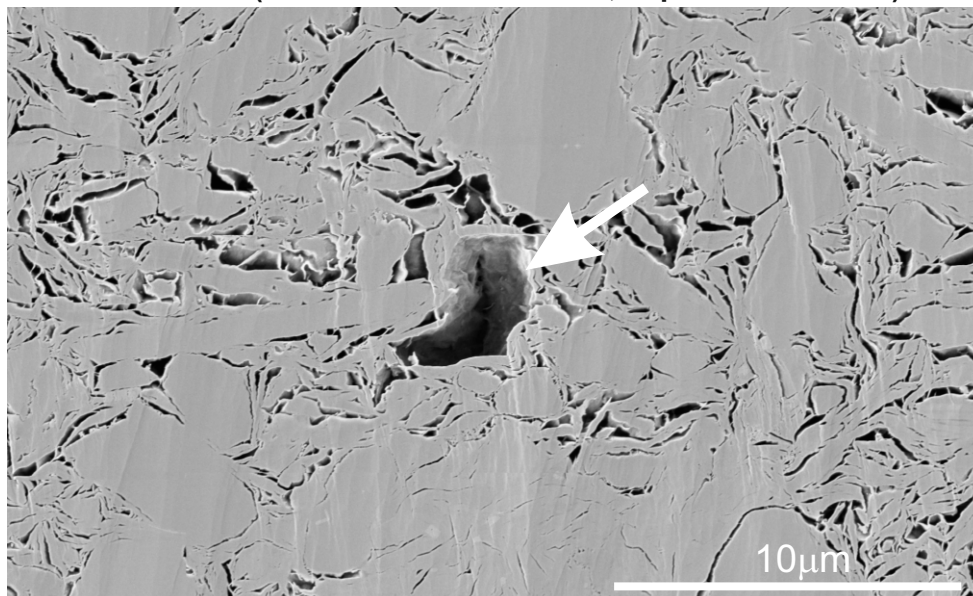

Supplementary data-10: Large, silt-adjacent pores observed in samples SN-10, SN-22, and SN-33. Note: Irrespective of variation in depth/effective stress all samples retain same maximum pore size (ca.  $10^7 \text{nm}^2$ ).
