# Supplementary material for: Mechanical compaction mechanisms in the input sediments of the Sumatra Subduction Complex- insights from microstructural analysis of cores from IODP Expedition- 362
Source: Copernicus journal article supplement (doi:10.5194/se-2022-11), 2022-02-03
Supplement: Supplementary file 16 [file se-2022-11-supplement.zip › Supplementary data/Supplementary data-11.pdf]

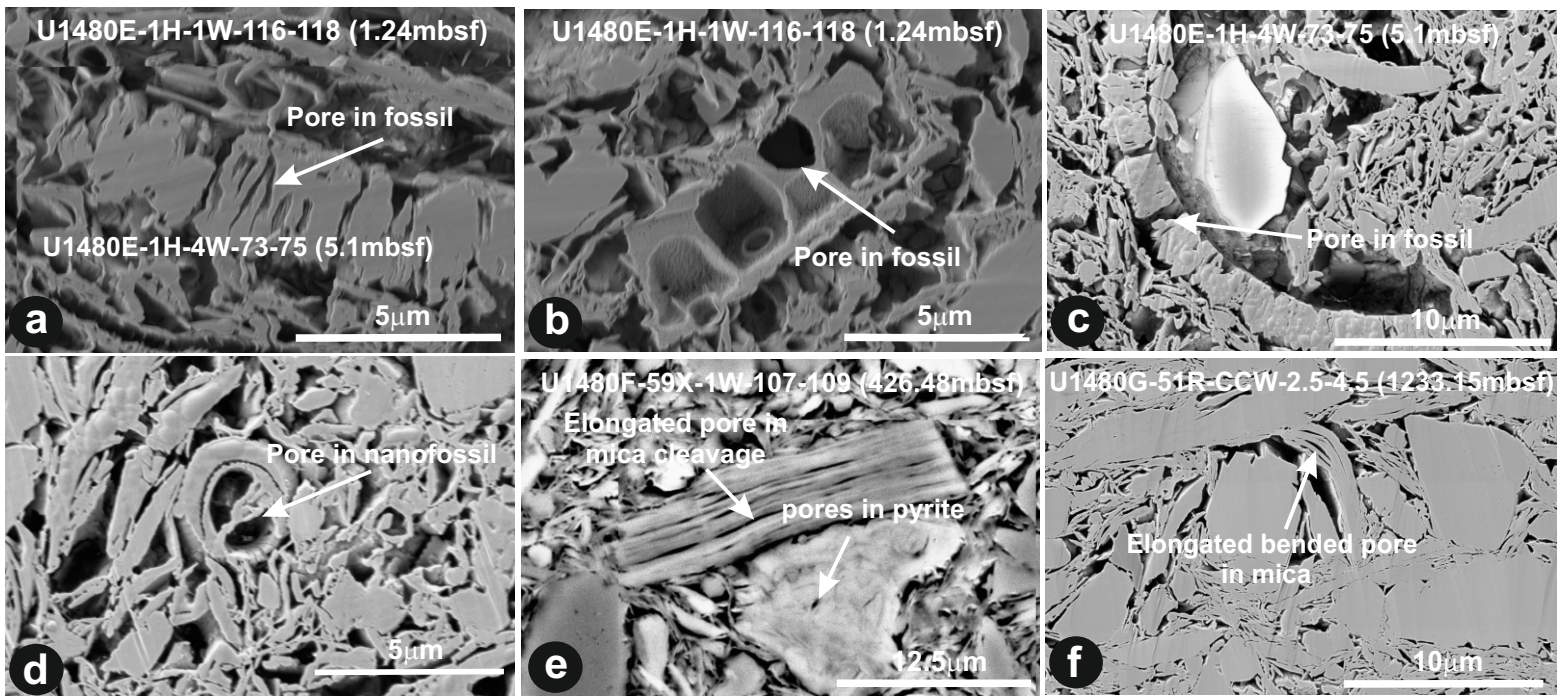

Supplementary data-11: Intraparticle pore types. (a) and (c) elongated pores in fossil; (b) large rounded pores in fossil; (d) large rounded pore in coccolith; (e) typical cleavage parallel elongated fractures in mica; (f) secondary pores in mica developed due to bending during compact.
