# Supplementary material for: Mechanical compaction mechanisms in the input sediments of the Sumatra Subduction Complex- insights from microstructural analysis of cores from IODP Expedition- 362
Source: Copernicus journal article supplement (doi:10.5194/se-2022-11), 2022-02-03
Supplement: Supplementary file 16 [file se-2022-11-supplement.zip › Supplementary data/supplementary data-13.pdf]

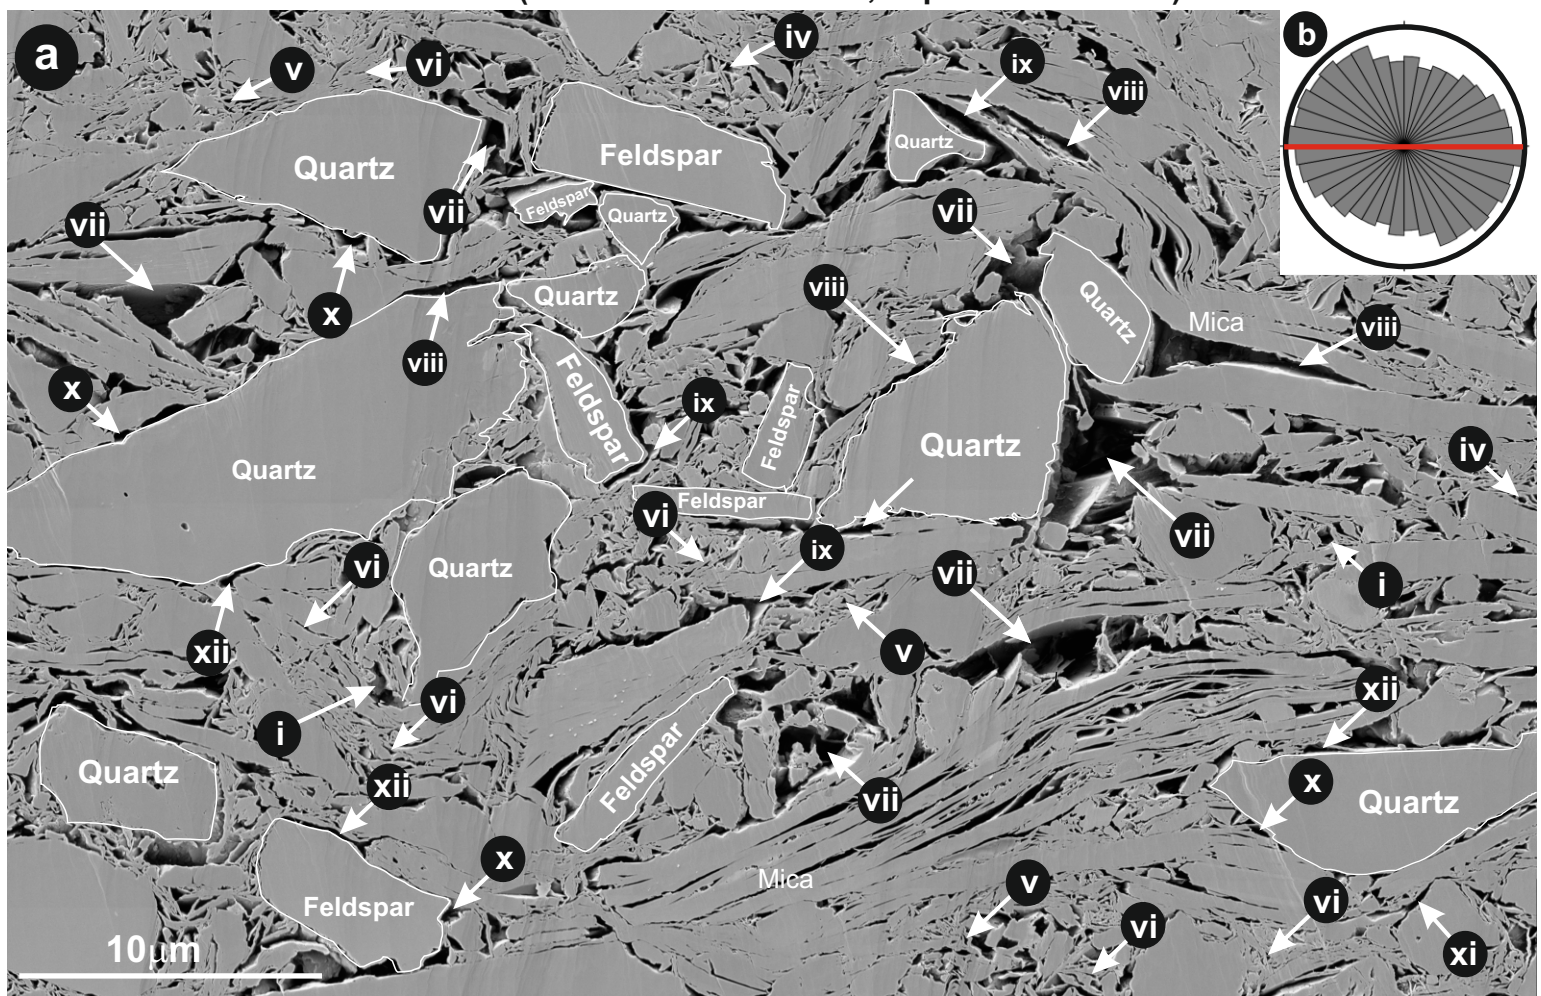

Supplementary data-13: Silt-rich sample (SN-29; 1173 mbsf) (a) i = Equant large clay domain pores, ii = elongated large clay domain pores, iii = Crescent-shaped large clay domain pores, iv = equant small clay domain pores, v = Crescent-shaped small clay domain pores, vi = elongated small clay domain pores, vii = Equant large silt-adjacent pores, viii = elongated large silt-adjacent pores, ix = Crescent-shaped large silt-adjacent pores, x = equant small silt-adjacent pores, xi = Crescent-shaped small silt-adjacent pores, xii = elongated small silt-adjacent pores. (b) Rose diagram of long axes of pores (bedding = red line).
