# Supplementary material for: Mechanical compaction mechanisms in the input sediments of the Sumatra Subduction Complex- insights from microstructural analysis of cores from IODP Expedition- 362
Source: Copernicus journal article supplement (doi:10.5194/se-2022-11), 2022-02-03
Supplement: Supplementary file 16 [file se-2022-11-supplement.zip › Supplementary data/Supplementary data-14.pdf]

a)

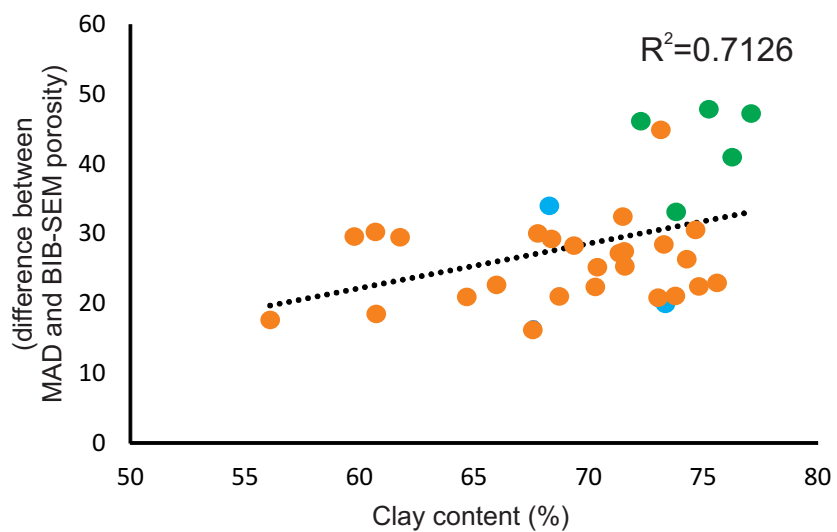

b)

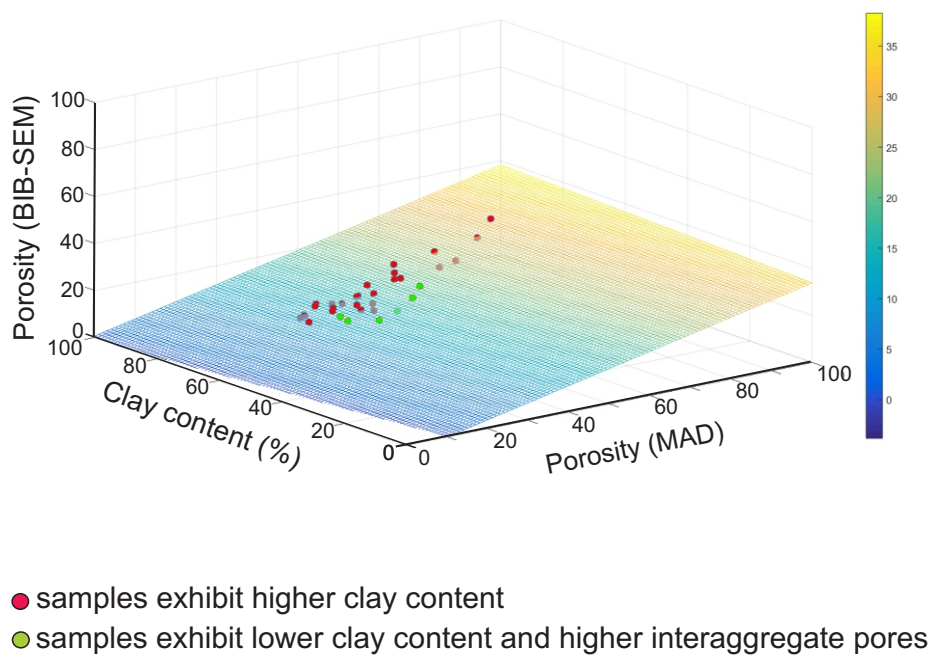

Supplementary data-14: (a) Clay content vs difference between MAD and BIB-SEM porosity. (b) Multivariate regression analysis using three parameters: BIB-SEM porosity, clay content, and MAD porosity (33 samples).
